# Supplementary material
Source: MDPI journal article supplement (https://www.mdpi.com/1999-4907/14/5/994)
Supplement: s1 [file s1 › forests-2291945-supplementary.pdf]

# Effects of Tree Diversity, Functional Composition, and Large Trees on the Aboveground Biomass of an Old-Growth Subtropical Forest in Southern China

Yaoyi Wang <sup>1</sup>, Zheng Song <sup>2,\*</sup>, Xiongqing Zhang <sup>3</sup> and Hongxiang Wang <sup>1,\*</sup>

<sup>1</sup> Guangxi Key Laboratory of Forest Ecology and Conservation, College of Forestry, Guangxi University, Nanning 530004, China

<sup>2</sup> Research Institute of Forestry Policy and Information, Chinese Academy of Forestry, Beijing 100091, China

<sup>3</sup> Key Laboratory of Tree Breeding and Cultivation of the National Forestry and Grassland Administration, Research Institute of Forestry, Chinese Academy of Forestry, Beijing 100091, China

\* Correspondence: songzheng556@163.com (Z.S.); wanghongxiang168@126.com (H.W.)

## Supplementary Figures

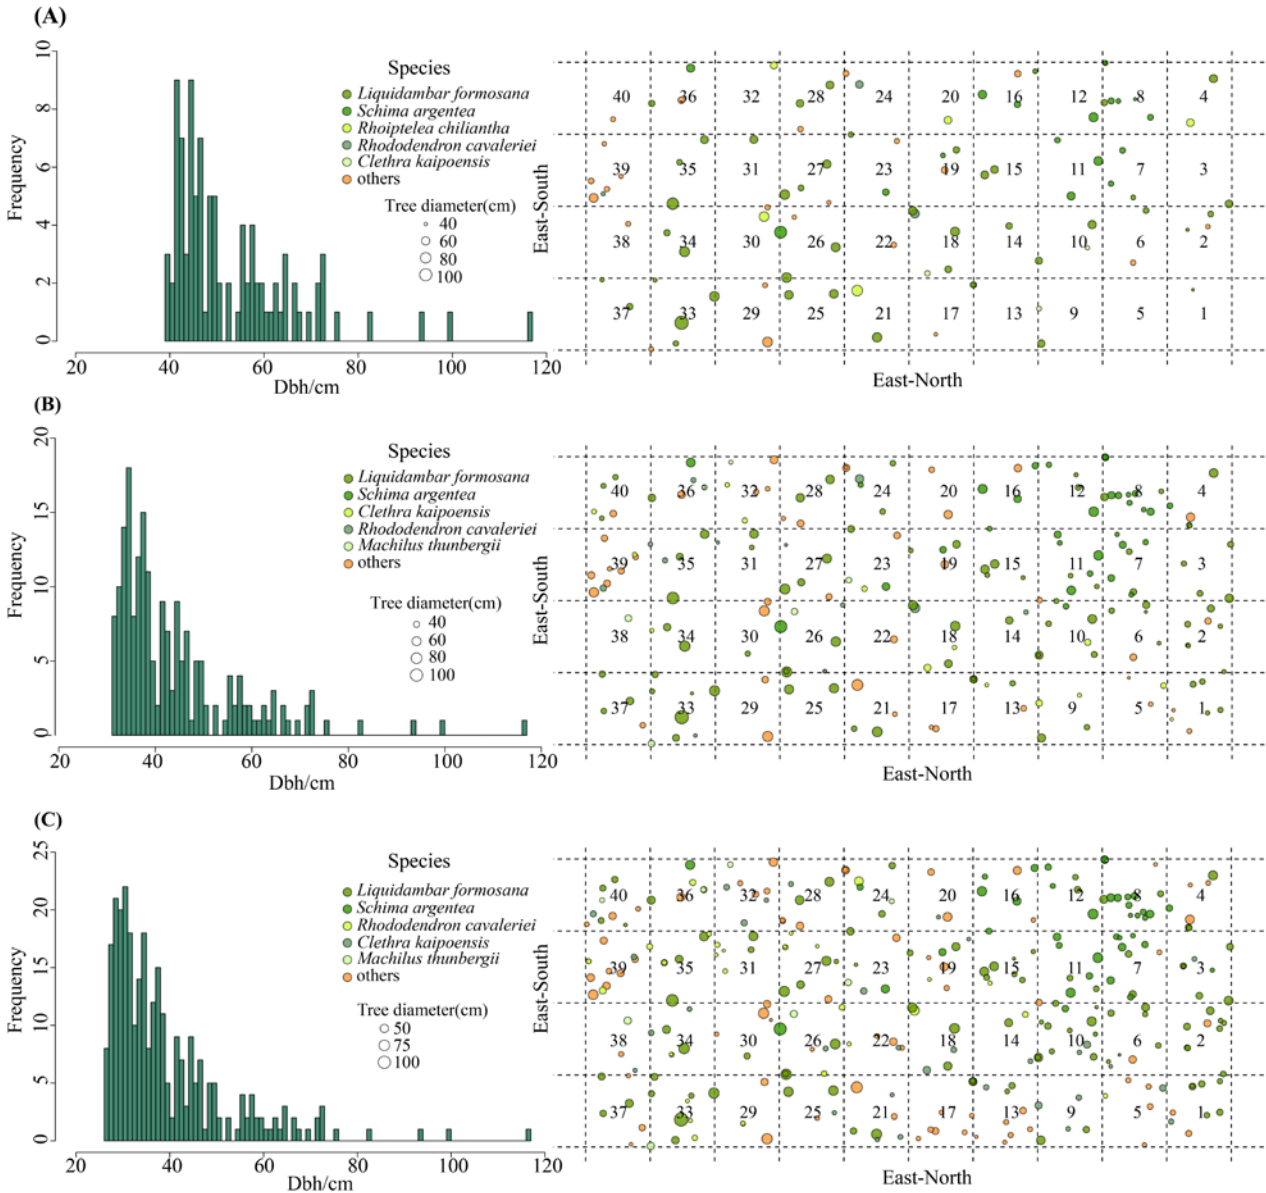

**Figure S1.** Diameter distribution and spatial distribution of large trees in the study plot. Subplot (20m × 20m) serial numbers are indicated by numbers 1-40. The green legend indicates the top 5 most abundant species of large trees, while the orange legend indicates other species. (A) Top 1% Large trees. (B) Top 2% Large trees. (C) Top 3% Large trees. (D) Top 3% Large trees.

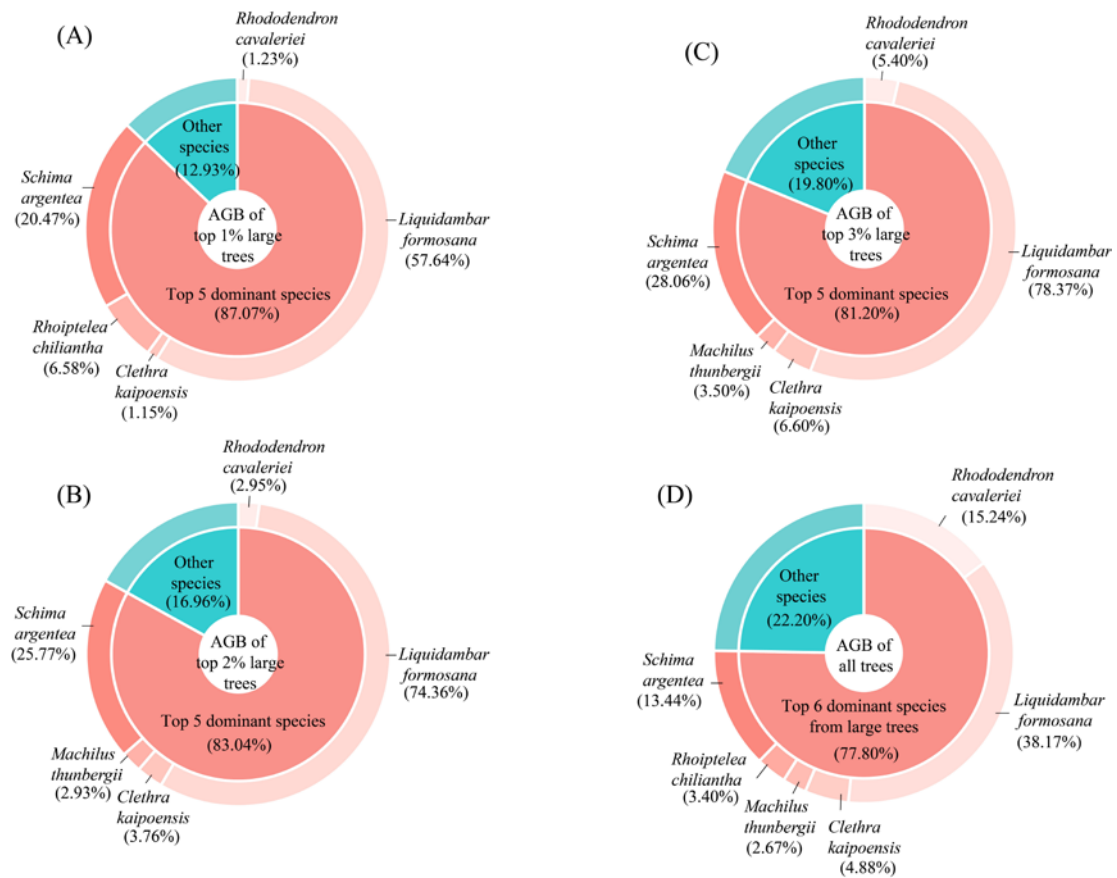

**Figure S2.** Proportions of AGB accounted for by dominant species. (A) Proportion of AGB accounted for by the top 5 dominant species among the top 1% large trees. (B) Proportion of AGB accounted for by the top 5 dominant species among the top 2% large trees. (C) Proportion of AGB accounted for by the top 5 dominant species among the top 3% large trees. (D) Proportion of AGB accounted for by the top 6 dominant species from the large trees among the entire community.

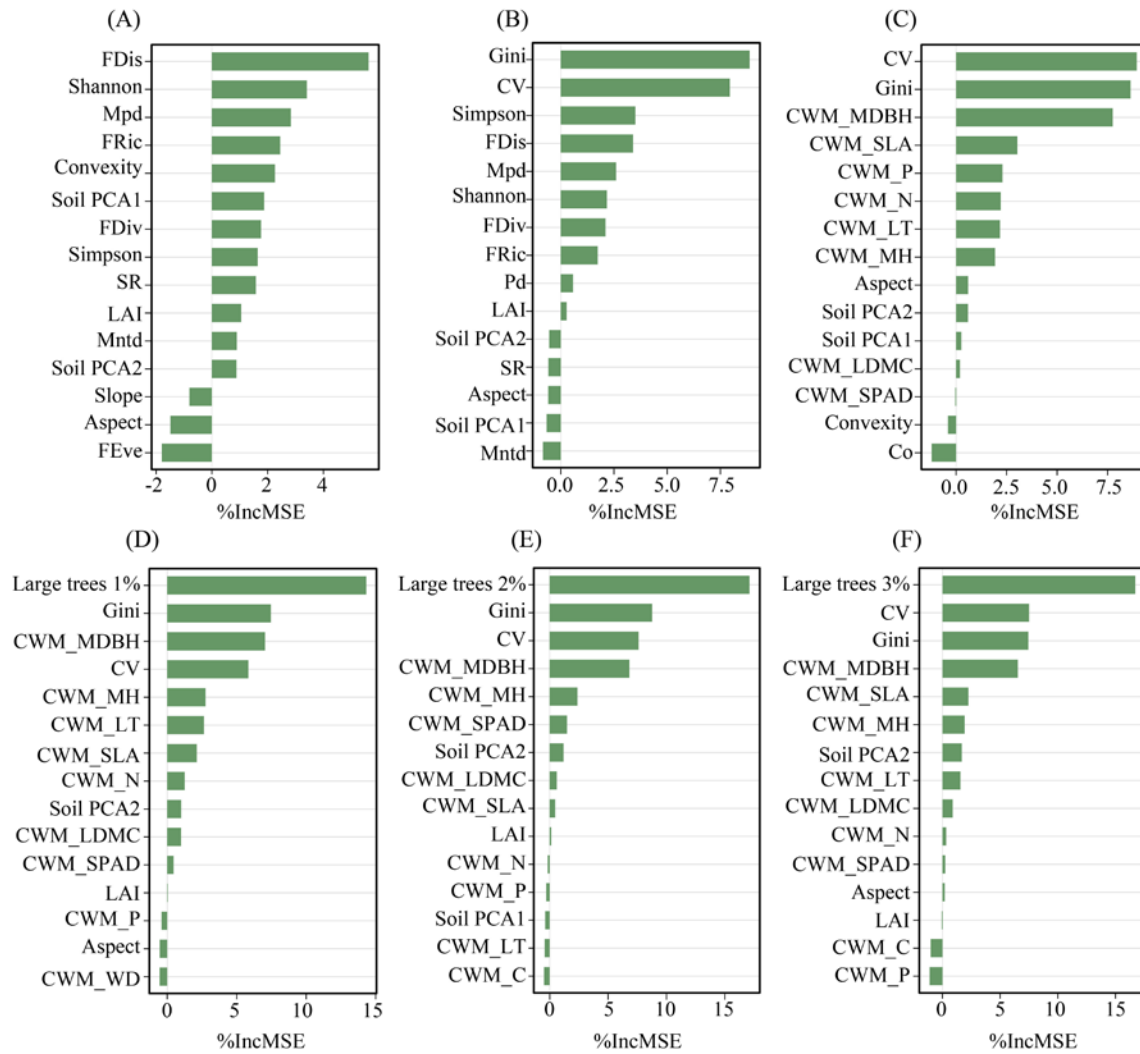

**Figure S3.** Random forest analysis of the relative importance of biotic and abiotic variables to AGB. The variable importance values are expressed as the percentage increase of mean square error (%IncMSE), and 15 top variables are shown. **(A)** Species, phylogenetic and functional diversity and environmental factors. **(B)** Tree diversity and environmental factors. **(C)** Trees diversity, functional composition and environmental factors. **(D)** Trees diversity, functional composition, top 1% large trees and environmental factors. **(E)** Trees diversity, functional composition, top 2% large trees and environmental factors. **(F)** Trees diversity, functional composition, top 3% large trees and environmental factors. Please refer to figure 3 notes for variable abbreviation interpretation.

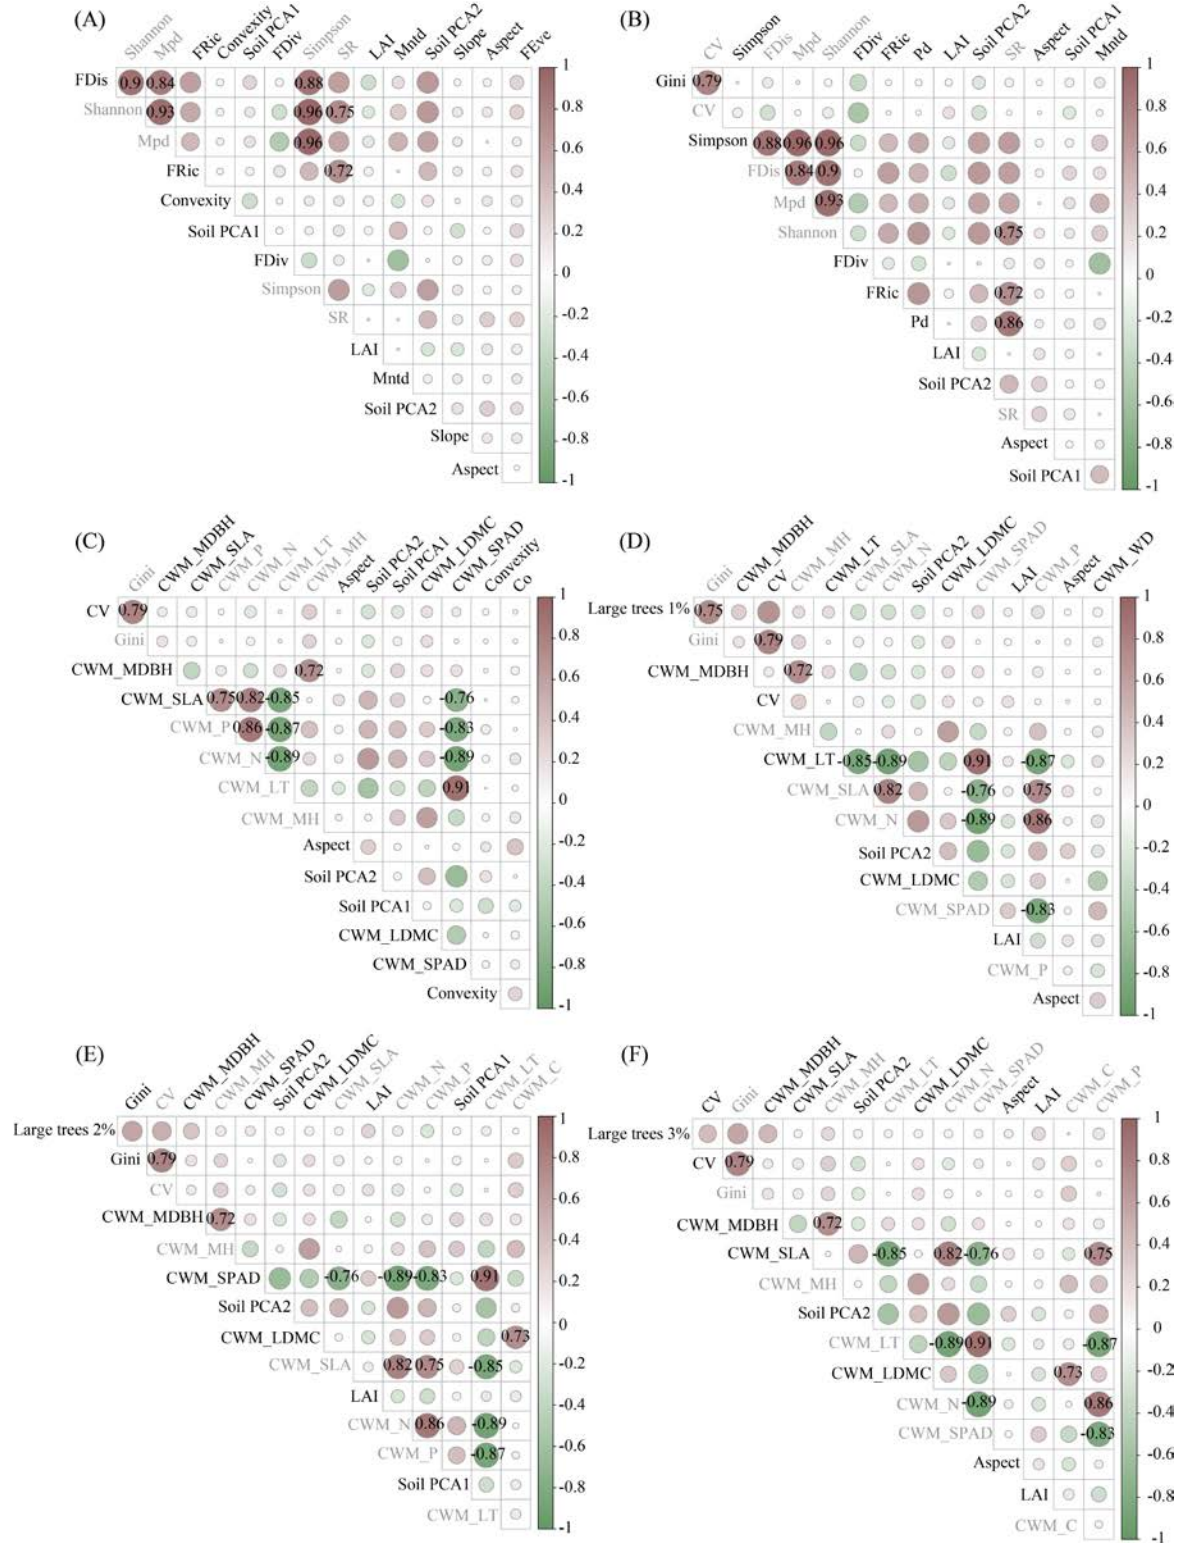

**Figure S4.** Correlation analysis of the most important 15 explanatory variables. Variables that were able to enter the structural equation models are represented in black fonts, while variables that were eliminated are represented in gray fonts. (A) Species, phylogenetic and functional diversity and environmental factors. (B) Tree diversity and environmental factors. (C) Trees diversity, functional composition and environmental factors. (D) Trees diversity, functional composition, top 1% large trees and environmental factors. (E) Trees diversity, functional composition, top 2% large trees and environmental factors. (F) Trees diversity, functional composition, top 3% large trees and environmental factors. The abbreviation interpretation of the variables can be found in the notes of figure 3.

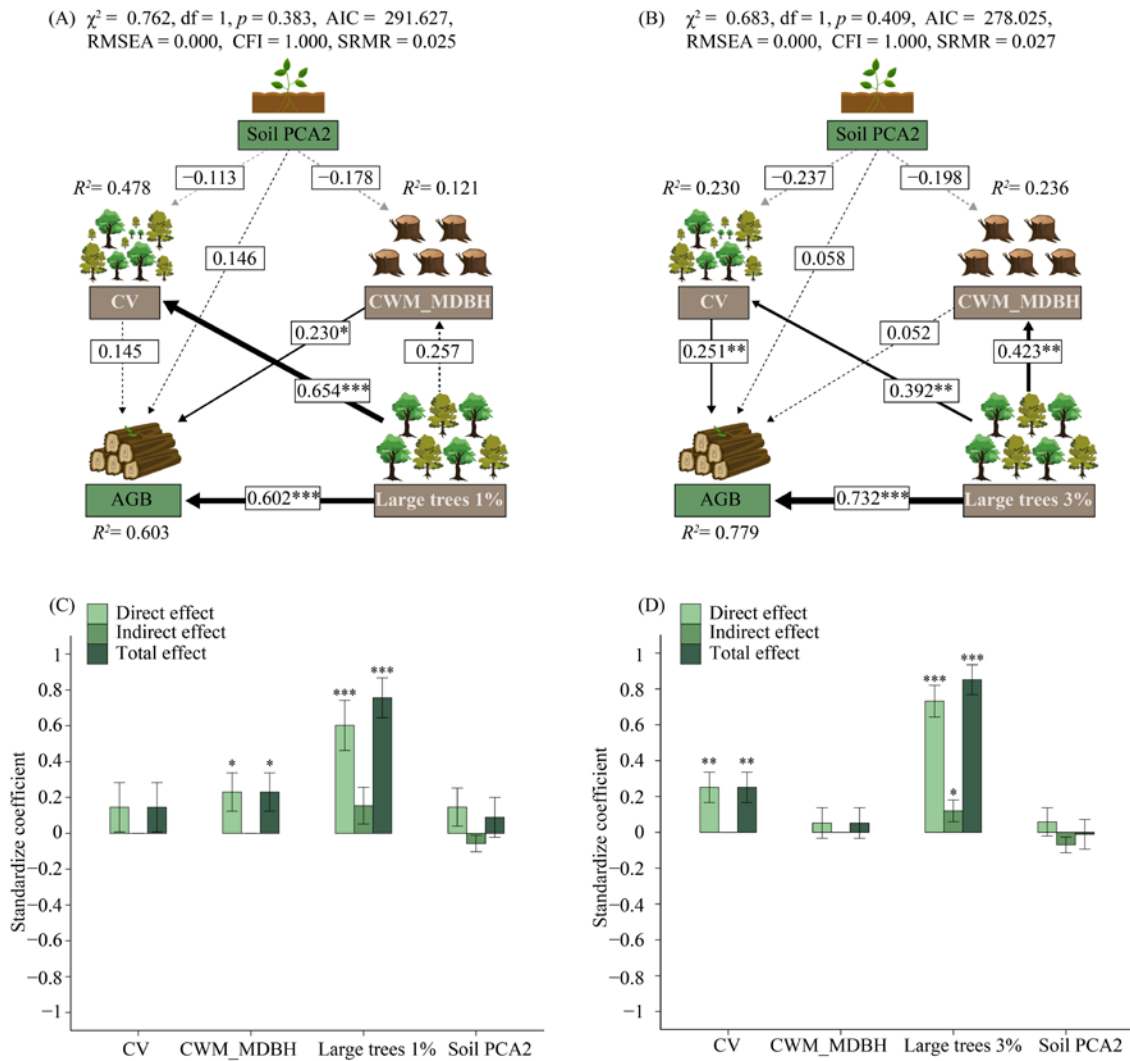

**Figure S5.** Optimal structural equation models (SEMs) results for different thresholds of large trees and the standardized coefficients derived from SEMs. **(A)** Effects of tree size inequality, functional composition and top 1% large trees on AGB. **(B)** Effects of tree size inequality, functional composition and top 3% large trees on AGB. **(C)** Comparison of direct (light green bar) indirect (green bar) and total effects (dark green bar) derived from SEM (Figure S5. A). **(D)** Comparison of direct (light green bar) indirect (green bar) and total effects (dark green bar) derived from SEM (Figure S5. B). The width of the arrow represents the strength of the relationship, with the solid black line and the solid gray line indicating significant positive and negative effects, respectively. The values near solid arrows indicate normalized coefficients with different levels of significance (\*  $p < 0.05$ , \*\*  $p < 0.01$ , \*\*\*  $p < 0.001$ ). and the dotted arrows indicate non-significant effects.  $R^2$ , the percentage explained by dependent variables;  $\chi^2$ , Chi-square value;  $df$ , Degrees of freedom;  $p$ , the  $p$ -value of chi-square test; AIC, Akaike information criterion; RMSEA, Root mean square error of approximation; CFI, Comparative fit index; SRMR, Standardized root mean square residual. Data shows standardized coefficient  $\pm$  standard error. See figure 3 notes for variable abbreviation interpretations.

# Supplementary Tables

**Table S1.** Summary statistics of environmental factors.

| Environment Factors                         | Abbreviations | Mean    | Standard<br>Deviation | Max     | Min     | Median  | Coefficient of<br>Variation<br>(%) |
|---------------------------------------------|---------------|---------|-----------------------|---------|---------|---------|------------------------------------|
| Soil pH                                     | PH            | 3.93    | 0.13                  | 4.31    | 3.76    | 3.92    | 3.18                               |
| Soil total nitrogen (g/kg)                  | TN            | 3.57    | 0.90                  | 6.57    | 2.39    | 3.40    | 25.29                              |
| Soil organic carbon (g/kg)                  | OC            | 67.31   | 17.93                 | 130.31  | 43.33   | 64.63   | 26.64                              |
| Soil total phosphorus (g/kg)                | TP            | 0.66    | 0.10                  | 0.95    | 0.48    | 0.65    | 15.60                              |
| Soil total potassium (g/kg)                 | TK            | 12.32   | 1.84                  | 17.62   | 10.42   | 11.70   | 14.90                              |
| Soil alkaline hydrolysis nitrogen<br>(g/kg) | AHN           | 155.31  | 21.14                 | 206.82  | 123.03  | 153.95  | 13.61                              |
| Soil available phosphorus (g/kg)            | AP            | 1.00    | 0.43                  | 2.35    | 0.45    | 0.90    | 43.40                              |
| Soil available potassium (g/kg)             | AK            | 81.75   | 11.17                 | 107.67  | 63.67   | 80.17   | 13.67                              |
| Soil moisture content                       | SMC           | 0.86    | 0.14                  | 1.20    | 0.53    | 0.85    | 16.50                              |
| Slope                                       | Slope         | 26.75   | 2.86                  | 33.12   | 22.30   | 26.81   | 10.70                              |
| Aspect                                      | Aspect        | 171.95  | 26.48                 | 239.58  | 104.19  | 171.86  | 15.40                              |
| Convexity                                   | Convexity     | −0.14   | 0.62                  | 1.30    | −1.24   | −0.27   | 117.47                             |
| Elevation                                   | Elevation     | 1753.90 | 11.00                 | 1772.14 | 1730.00 | 1754.90 | 0.63                               |
| Canopy openness                             | Co            | 0.16    | 0.04                  | 0.27    | 0.10    | 0.16    | 25.26                              |

**Table S2.** The top 20 species ranked by important value in the forest plot.

| Species                        | Abundance | DBH Range (cm) | Average DBH<br>(cm) | Important<br>Value (%) |
|--------------------------------|-----------|----------------|---------------------|------------------------|
| <i>Rhododendron cavaleriei</i> | 1223      | [1.0, 64.1]    | 12.7                | 13.66                  |
| <i>Liquidambar formosana</i>   | 194       | [1.0, 117.0]   | 30.4                | 9.92                   |
| <i>Eurya impressinervis</i>    | 1111      | [1.0, 73.0]    | 7.9                 | 8.31                   |
| <i>Eurya nitida</i>            | 1958      | [1.0, 20.0]    | 2.0                 | 8.18                   |
| <i>Ilex ficoidea</i>           | 1301      | [1.0, 46.2]    | 2.4                 | 6.36                   |
| <i>Schima argentea</i>         | 102       | [1.0, 99.5]    | 21.6                | 4.05                   |
| <i>Litsea elongata</i>         | 614       | [1.0, 21.6]    | 3.3                 | 3.66                   |
| <i>Clethra kaipoensis</i>      | 98        | [1.0, 44.9]    | 23.3                | 3.30                   |
| <i>Schefflera metcalfiana</i>  | 432       | [1.0, 4.2]     | 1.9                 | 2.67                   |
| <i>Manglietia fordiana</i>     | 240       | [1.0, 42.0]    | 5.1                 | 2.58                   |
| <i>Neolitsea chuii</i>         | 309       | [1.0, 41.4]    | 3.1                 | 2.35                   |
| <i>Photinia beauverdiana</i>   | 124       | [1.0, 35.5]    | 8.5                 | 1.99                   |
| <i>Ficus erecta</i>            | 251       | [1.0, 5.9]     | 1.9                 | 1.86                   |
| <i>Dendropanax dentiger</i>    | 192       | [1.0, 22.0]    | 3.2                 | 1.82                   |
| <i>Machilus thunbergii</i>     | 56        | [14.0, 43.2]   | 18.1                | 1.78                   |
| <i>Symplocos botryantha</i>    | 190       | [1.0, 3.8]     | 1.6                 | 1.57                   |
| <i>Neolitsea aurata</i>        | 129       | [1.0, 22.9]    | 3.0                 | 1.55                   |
| <i>Styrax japonicus</i>        | 87        | [1.0, 41.2]    | 3.8                 | 1.23                   |
| <i>Laurocerasus spinulosa</i>  | 74        | [1.0, 45.2]    | 3.8                 | 1.22                   |
| <i>Rhoiptelea chiliantha</i>   | 13        | [3.9, 83.0]    | 37.2                | 1.19                   |

**Table S3.** Summary of the selected generalized least-squares (GLS) models for the relationships between AGB and its affecting factors, including both biotic and abiotic factors.

| GLS Model      | Model       | Coefficient | t-Value | P-Value | AIC      |
|----------------|-------------|-------------|---------|---------|----------|
| AGB ~ SR       | Non-spatial | -0.053      | -0.33   | 0.740   | 122.071  |
|                | Spatial     | -0.053      | -0.33   | 0.740   | 126.071  |
| AGB ~ Simpson  | Non-spatial | -0.188      | -1.18   | 0.245   | 120.81   |
|                | Spatial     | -0.188      | -1.18   | 0.245   | 124.81   |
| AGB ~ Shannon  | Non-spatial | 0.182       | -1.142  | 0.261   | 120.90   |
|                | Spatial     | 0.182       | -1.142  | 0.261   | 124.90   |
| AGB ~ Pd       | Non-spatial | -0.081      | -0.50   | 0.620   | 121.93   |
|                | Spatial     | -0.081      | -0.50   | 0.620   | 125.93   |
| AGB ~ Mpd      | Non-spatial | -0.141      | -0.876  | 0.387   | 121.42   |
|                | Spatial     | -0.141      | -0.876  | 0.387   | 125.42   |
| AGB ~ Mntd     | Non-spatial | -0.071      | -0.436  | 0.665   | 121.99   |
|                | Spatial     | -0.071      | -0.436  | 0.665   | 125.99   |
| AGB ~ FDis     | Non-spatial | -0.22       | -1.415  | 0.165   | 120.23   |
|                | Spatial     | -0.22       | -1.415  | 0.165   | 124.23   |
| AGB ~ FRic     | Non-spatial | -0.085      | -0.526  | 0.602   | 121.903  |
|                | Spatial     | -0.085      | -0.526  | 0.602   | 125.903  |
| AGB ~ FEve     | Non-spatial | -0.140      | -0.869  | 0.391   | 121.43   |
|                | Spatial     | -0.140      | -0.869  | 0.391   | 125.43   |
| AGB ~ FDiv     | Non-spatial | 0.109       | -0.676  | 0.503   | 121.72   |
|                | Spatial     | 0.109       | -0.676  | 0.503   | 125.72   |
| AGB ~ CWM_LT   | Non-spatial | 0.161       | 1.004   | 0.321   | 121.18   |
|                | Spatial     | 0.161       | 1.004   | 0.321   | 125.18   |
| AGB ~ CWM_WD   | Non-spatial | 0.097       | 0.602   | 0.551   | 121.82   |
|                | Spatial     | 0.097       | 0.602   | 0.551   | 125.82   |
| AGB ~ CWM_SPAD | Non-spatial | 0.177       | 1.106   | 0.276   | 120.975  |
|                | Spatial     | 0.177       | 1.106   | 0.276   | 124.975  |
| AGB ~ CWM_SLA  | Non-spatial | -0.157      | -0.981  | 0.330   | 121.23   |
|                | Spatial     | -0.157      | -0.981  | 0.330   | 121.23   |
| AGB ~ CWM_LDMC | Non-spatial | -0.082      | -0.509  | 0.614   | 121.92   |
|                | Spatial     | -0.082      | -0.509  | 0.614   | 125.92   |
| AGB ~ CWM_C    | Non-spatial | 0.054       | 0.336   | 0.74    | 122.07   |
|                | Spatial     | 0.054       | 0.336   | 0.74    | 126.07   |
| AGB ~ CWM_N    | Non-spatial | -0.22       | -1.371  | 0.178   | 120.343  |
|                | Spatial     | -0.22       | -1.371  | 0.178   | 124.343  |
| AGB ~ CWM_P    | Non-spatial | -0.223      | -1.413  | 0.166   | 120.232  |
|                | Spatial     | -0.223      | -1.413  | 0.166   | 124.232  |
| AGB ~ CWM_MDBH | Non-spatial | 0.396       | 2.661   | 0.011   | 115.6839 |
|                | Spatial     | 0.396       | 2.661   | 0.011   | 119.6839 |
| AGB ~ CWM_MH   | Non-spatial | 0.165       | 1.03    | 0.310   | 121.1328 |
|                | Spatial     | 0.165       | 1.03    | 0.310   | 125.1328 |
| AGB ~ Gini     | Non-spatial | 0.626       | 4.95    | 0.000   | 103.294  |

| GLS Model               | Model       | Coefficient | t-Value | P-Value | AIC      |
|-------------------------|-------------|-------------|---------|---------|----------|
| AGB ~ CV                | Spatial     | 0.626       | 4.95    | 0.000   | 107.294  |
|                         | Non-spatial | 0.548       | 4.036   | 0.000   | 108.6239 |
|                         | Spatial     | 0.548       | 4.036   | 0.000   | 112.6239 |
| AGB ~ Large trees<br>1% | Non-spatial | 0.74        | 6.70    | 0.000   | 92.541   |
|                         | Spatial     | 0.74        | 6.70    | 0.000   | 96.541   |
| AGB ~ Large trees<br>2% | Non-spatial | 0.85        | 9.94    | 0.000   | 78.42    |
|                         | Spatial     | 0.85        | 9.94    | 0.000   | 85.70    |
| AGB ~ Large trees<br>3% | Non-spatial | 0.85        | 10.14   | 0.000   | 72.38    |
|                         | Spatial     | 0.85        | 10.14   | 0.000   | 76.38    |
| AGB ~ Soil PCA1         | Non-spatial | -0.123      | -0.762  | 0.451   | 121.6024 |
|                         | Spatial     | -0.123      | -0.762  | 0.451   | 125.6024 |
| AGB ~ Soil PCA2         | Non-spatial | -0.104      | -0.642  | 0.525   | 121.7683 |
|                         | Spatial     | -0.104      | -0.642  | 0.525   | 125.7683 |
| AGB ~ Slope             | Non-spatial | -0.037      | -0.226  | 0.822   | 122.1276 |
|                         | Spatial     | -0.037      | -0.226  | 0.822   | 126.1276 |
| AGB ~ Aspect            | Non-spatial | 0.054       | 0.331   | 0.742   | 122.0693 |
|                         | Spatial     | 0.054       | 0.331   | 0.742   | 126.0693 |
| AGB ~ Elevation         | Non-spatial | 0.158       | 0.988   | 0.329   | 121.2148 |
|                         | Spatial     | 0.158       | 0.988   | 0.329   | 125.2148 |
| AGB ~ Convexity         | Non-spatial | 0.096       | 0.596   | 0.555   | 121.8252 |
|                         | Spatial     | 0.096       | 0.596   | 0.555   | 125.8252 |
| AGB ~ Co                | Non-spatial | 0.006       | 0.039   | 0.969   | 122.1773 |
|                         | Spatial     | 0.006       | 0.039   | 0.969   | 126.1773 |
| AGB ~ LAI               | Non-spatial | 0.161       | 1.006   | 0.321   | 121.1792 |
|                         | Spatial     | 0.161       | 1.006   | 0.321   | 125.1792 |

Notes: The variables abbreviation interpretation see figure 3 notes.

**Table S4.** Comparison of results from multiple linear regression models predicting AGB based on biotic and abiotic factors.

| Variables                                                    | Models                                                  | df | logLik | AICc   | Delta | R <sup>2</sup> |
|--------------------------------------------------------------|---------------------------------------------------------|----|--------|--------|-------|----------------|
| Species, phylogenetic and functional diversity               | ~ FDis                                                  | 3  | -55.22 | 117.11 | 0.29  | 0.05           |
|                                                              | ~ LAI                                                   | 3  | -55.73 | 118.12 | 1.29  | 0.03           |
|                                                              | ~ FEve                                                  | 3  | -55.86 | 118.38 | 1.56  | 0.02           |
|                                                              | ~ Soil PCA1                                             | 3  | -55.95 | 118.56 | 1.74  | 0.02           |
|                                                              | ~ FDiv                                                  | 3  | -56.01 | 118.69 | 1.86  | 0.01           |
|                                                              | ~ Soil PCA2                                             | 3  | -56.04 | 118.74 | 1.91  | 0.01           |
|                                                              | ~ Convexity                                             | 3  | -56.07 | 118.80 | 1.97  | 0.01           |
| Tree diversity                                               | ~ Gini + LAI                                            | 4  | -44.91 | 98.97  | 0.00  | 0.43           |
|                                                              | ~ Gini + LAI + Soil PCA2 + Simpson                      | 6  | -42.33 | 99.21  | 0.23  | 0.50           |
|                                                              | ~ Gini                                                  | 3  | -46.31 | 99.29  | 0.32  | 0.39           |
|                                                              | ~ Gini + Simpson                                        | 4  | -45.22 | 99.58  | 0.61  | 0.42           |
|                                                              | ~ Gini + LAI + Mntd                                     | 5  | -43.91 | 99.59  | 0.62  | 0.46           |
|                                                              | ~ Gini + Soil PCA2 + Simpson                            | 5  | -44.01 | 99.79  | 0.82  | 0.46           |
|                                                              | ~ Gini + Mntd                                           | 4  | -45.39 | 99.92  | 0.95  | 0.42           |
|                                                              | ~ Gini + LAI + Simpson                                  | 5  | -44.19 | 100.14 | 1.17  | 0.45           |
|                                                              | ~ FDiv + Gini + LAI                                     | 5  | -44.25 | 100.26 | 1.29  | 0.45           |
|                                                              | ~ FDiv + Gini                                           | 4  | -45.73 | 100.60 | 1.63  | 0.41           |
| Functional composition and tree size inequality              | ~ CV + CWM_LDMC + CWM_MDBH + Soil PCA2                  | 6  | -39.65 | 93.84  | 0.00  | 0.56           |
|                                                              | ~ Aspect + CV + CWM_LDMC + CWM_MDBH + Soil PCA2         | 7  | -39.08 | 95.66  | 1.82  | 0.58           |
| Functional composition, tree size inequality and Large trees | ~ CV + CWM_LDMC + CWM_MDBH + Large trees 1% + Soil PCA2 | 7  | -31.14 | 79.78  | 0.00  | 0.72           |
|                                                              | ~ Large trees 2% + Gini                                 | 4  | -28.19 | 65.52  | 0.00  | 0.75           |
|                                                              | ~ CWM_MDBH + Large trees 2% + Gini                      | 5  | -27.46 | 66.68  | 1.16  | 0.76           |
|                                                              | ~ CWM_SPAD + Large trees 2% + Gini                      | 5  | -27.79 | 67.34  | 1.81  | 0.76           |
|                                                              | ~ Large trees 3% + CV                                   | 4  | -26.48 | 62.10  | 0.00  | 0.77           |
|                                                              | ~ Large trees 3% + CV + LAI                             | 5  | -26.12 | 64.00  | 1.90  | 0.78           |

**Notes:** Only models with delta < 2 are presented. **AICc** denotes Akaike information criterion for small samples; **Delta** represents the difference between the AICc of a given model and the best model; **df**, Degrees of freedom; **R<sup>2</sup>**, the percentage explained by variables in models; logLik, Log-likelihoods. For the interpretation of variable abbreviations, please refer to figure 3 notes.
